# Supplementary material for: A benchmark study of ab initio gene prediction methods in diverse eukaryotic organisms
Source: PubMed Central journal article supplement (PMC7147072; doi:10.1186/s12864-020-6707-9), 2020-04-09
Supplement: 12864_2020_6707_MOESM1_ESM.pdf [file 12864_2020_6707_MOESM1_ESM.pdf]

| UNIPROT<br>Species<br>identifier | Species name                                                      | UNIPROT<br>Species<br>identifier | Species name                                                                   |
|----------------------------------|-------------------------------------------------------------------|----------------------------------|--------------------------------------------------------------------------------|
| ACYPI                            | <i>Acyrtosiphon pisum</i>                                         | MUSPF                            | <i>Mustela putorius furo</i>                                                   |
| AEDAE                            | <i>Aedes aegypti</i>                                              | MYOLU                            | <i>Myotis lucifugus</i>                                                        |
| AILME                            | <i>Ailuropoda melanoleuca</i>                                     | NAEGR                            | <i>Naegleria gruberi</i>                                                       |
| ALLMA                            | <i>Allomyces macrogynus</i> ATCC 38327                            | NASVI                            | <i>Nasonia vitripennis</i>                                                     |
| ANOCA                            | <i>Anolis carolinensis</i>                                        | NEMVE                            | <i>Nematostella vectensis</i>                                                  |
| ANODA                            | <i>Anopheles darlingi</i>                                         | NOMLE                            | <i>Nomascus leucogenys</i>                                                     |
| ANOGA                            | <i>Anopheles gambiae</i>                                          | NOSCE                            | <i>Nosema ceranae</i> (strain BRL01)                                           |
| ASTMX                            | <i>Astyanax mexicanus</i>                                         | ONCVO                            | <i>Onchocerca volvulus</i>                                                     |
| ATTCE                            | <i>Atta cephalotes</i>                                            | ORENI                            | <i>Oreochromis niloticus</i>                                                   |
| AURAN                            | <i>Aureococcus anophagefferens</i>                                | ORNAN                            | <i>Ornithorhynchus anatinus</i>                                                |
| BATDJ                            | <i>Batrachochytrium dendrobatidis</i> (strain JAM81 / FGSC 10211) | ORYLA                            | <i>Oryzias latipes</i>                                                         |
| BETVU                            | <i>Beta vulgaris</i> subsp. <i>vulgaris</i>                       | OTOGA                            | <i>Otolemur garnettii</i>                                                      |
| BODSA                            | <i>Bodo saltans</i>                                               | PANTR                            | <i>Pan troglodytes</i>                                                         |
| BOMMO                            | <i>Bombyx mori</i>                                                | PAPAN                            | <i>Papio anubis</i>                                                            |
| BOVIN                            | <i>Bos taurus</i>                                                 | PARTE                            | <i>Paramecium tetraurelia</i>                                                  |
| BRUMA                            | <i>Brugia malayi</i>                                              | PEDHC                            | <i>Pediculus humanus</i> subsp. <i>corporis</i>                                |
| CAEBE                            | <i>Caenorhabditis brenneri</i>                                    | PELSI                            | <i>Pelodiscus sinensis</i>                                                     |
| CAEBR                            | <i>Caenorhabditis briggsae</i>                                    | PERM5                            | <i>Perkinsus marinus</i> (strain ATCC 50983 / TXsc)                            |
| CAEEL                            | <i>Caenorhabditis elegans</i>                                     | PHAAN                            | <i>Phaseolus angularis</i>                                                     |
| CAERE                            | <i>Caenorhabditis remanei</i>                                     | PHYIT                            | <i>Phytophthora infestans</i> (strain T30-4)                                   |
| CALJA                            | <i>Callithrix jacchus</i>                                         | PHYNI                            | <i>Phytophthora nicotianae</i>                                                 |
| CANLF                            | <i>Canis lupus familiaris</i>                                     | PHYPN                            | <i>Phytophthora parasitica</i> (strain INRA-310)                               |
| CAVPO                            | <i>Cavia porcellus</i>                                            | PHYPR                            | <i>Phytophthora parasitica</i> P1569/<br><i>Phytophthora parasitica</i> P10297 |
| CHICK                            | <i>Gallus gallus</i>                                              | PHYRM                            | <i>Phytophthora ramorum</i>                                                    |
| CHLRE                            | <i>Chlamydomonas reinhardtii</i>                                  | PHYSP                            | <i>Phytophthora sojae</i> (strain P6497)                                       |
| CHLSB                            | <i>Chlorocebus sabaesus</i>                                       | PIG                              | <i>Sus scrofa</i>                                                              |
| CIOIN                            | <i>Ciona intestinalis</i>                                         | PLABS                            | <i>Plasmodiophora brassicae</i>                                                |
| CIOSA                            | <i>Ciona savignyi</i>                                             | POEFO                            | <i>Poecilia formosa</i>                                                        |
| CRAGI                            | <i>Crassostrea gigas</i>                                          | PONAB                            | <i>Pongo abelii</i>                                                            |
| CULQU                            | <i>Culex quinquefasciatus</i>                                     | PRIPA                            | <i>Pristionchus pacificus</i>                                                  |
| DANRE                            | <i>Danio rerio</i>                                                | PSEPJ                            | <i>Pseudocohnilembus persalinus</i>                                            |
| DAPPU                            | <i>Daphnia pulex</i>                                              | PYTUL                            | <i>Pythium ultimum</i> DAOM BR144                                              |
| DENPD                            | <i>Dendroctonus ponderosae</i>                                    | RABIT                            | <i>Oryctolagus cuniculus</i>                                                   |
| DROAN                            | <i>Drosophila ananassae</i>                                       | RAT                              | <i>Rattus norvegicus</i>                                                       |
| DROGR                            | <i>Drosophila grimshawi</i>                                       | RETFI                            | <i>Reticulomyxa filosa</i>                                                     |
| DROME                            | <i>Drosophila melanogaster</i>                                    | RHOPR                            | <i>Rhodnius prolixus</i>                                                       |
| DROMO                            | <i>Drosophila mojavensis</i>                                      | SALR5                            | <i>Salpingoeca rosetta</i> (strain ATCC 50818 / BSB-021)                       |
| DROPE                            | <i>Drosophila persimilis</i>                                      | SAPPC                            | <i>Saprolegnia parasitica</i> (strain CBS 223.65)                              |
| DROPS                            | <i>Drosophila pseudoobscura</i>                                   | SARHA                            | <i>Sarcophilus harrisii</i>                                                    |

|       |                                                 |        |                                                                                                                                                              |
|-------|-------------------------------------------------|--------|--------------------------------------------------------------------------------------------------------------------------------------------------------------|
| DROSE | <i>Drosophila sechellia</i>                     | SARSC  | <i>Sarcoptes scabiei</i>                                                                                                                                     |
| DROSI | <i>Drosophila simulans</i>                      | SCHMA  | <i>Schistosoma mansoni</i>                                                                                                                                   |
| DROVI | <i>Drosophila virilis</i>                       | SEMLL  | <i>Selaginella moellendorffii</i>                                                                                                                            |
| DROWI | <i>Drosophila willistoni</i>                    | SHEEP  | <i>Ovis aries</i>                                                                                                                                            |
| EMIHU | <i>Emiliana huxleyi</i>                         | SPIPNN | <i>Spizellomyces punctatus</i> DAOM BR117                                                                                                                    |
| ENTBH | <i>Enterocytozoon bieneusi</i> (strain H348)    | STRMM  | <i>Strigamia maritima</i>                                                                                                                                    |
| FELCA | <i>Felis catus</i>                              | STRPU  | <i>Strongylocentrotus purpuratus</i>                                                                                                                         |
| FICAL | <i>Ficedula albicollis</i>                      | STRRB  | <i>Strongyloides ratti</i>                                                                                                                                   |
| GASAC | <i>Gasterosteus aculeatus</i>                   | STYLE  | <i>Stylonychia lemnae</i>                                                                                                                                    |
| GIAIN | <i>Giardia intestinalis</i>                     | TAKRU  | <i>Takifugu rubripes</i>                                                                                                                                     |
| GONPR | <i>Gonapodya prolifera</i> JEL478               | TETNG  | <i>Tetraodon nigroviridis</i>                                                                                                                                |
| GORGO | <i>Gorilla gorilla gorilla</i>                  | TETTS  | <i>Tetrahymena thermophila</i> (strain SB210)                                                                                                                |
| GUITH | <i>Guillardia theta</i> CCMP2712                | TETUR  | <i>Tetranychus urticae</i>                                                                                                                                   |
| HAMHA | <i>Hammondia hammondi</i>                       | THAOC  | <i>Thalassiosira oceanica</i>                                                                                                                                |
| HELRO | <i>Helobdella robusta</i>                       | THAPS  | <i>Thalassiosira pseudonana</i>                                                                                                                              |
| HETGA | <i>Heterocephalus glaber</i>                    | THETB  | <i>Thecamonas trahens</i> ATCC 50062                                                                                                                         |
| HORSE | <i>Equus caballus</i>                           | TOXGV  | <i>Toxoplasma gondii</i> (strain ATCC 50861 / VEG)                                                                                                           |
| HUMAN | <i>Homo sapiens</i>                             | TRIAD  | <i>Trichoplax adhaerens</i>                                                                                                                                  |
| ICHMG | <i>Ichthyophthirius multifiliis</i> (strain G5) | TRICA  | <i>Tribolium castaneum</i>                                                                                                                                   |
| ICTTR | <i>Ictidomys tridecemlineatus</i>               | TRIVA  | <i>Trichomonas vaginalis</i>                                                                                                                                 |
| IXOSC | <i>Ixodes scapularis</i>                        | TRYCC  | <i>Trypanosoma cruzi</i> (strain CL Brener)                                                                                                                  |
| LATCH | <i>Latimeria chalumnae</i>                      | TRYCR  | <i>Trypanosoma cruzi</i> Dm28c                                                                                                                               |
| LEIBR | <i>Leishmania braziliensis</i>                  | TRYRA  | <i>Trypanosoma rangeli</i> SC58                                                                                                                              |
| LEIIN | <i>Leishmania infantum</i>                      | VITBC  | <i>Vitrella brassicaformis</i> (strain CCMP3155)                                                                                                             |
| LEIMA | <i>Leishmania major</i>                         | XENTR  | <i>Xenopus tropicalis</i>                                                                                                                                    |
| LEPOC | <i>Lepisosteus oculatus</i>                     | XIPMA  | <i>Xiphophorus maculatus</i>                                                                                                                                 |
| LEPSE | <i>Leptomonas seymouri</i>                      | ZOONE  | <i>Zootermopsis nevadensis</i>                                                                                                                               |
| LOTGI | <i>Lottia gigantea</i>                          | 9EIME  | <i>Eimeria mitis</i>                                                                                                                                         |
| LOXAF | <i>Loxodonta africana</i>                       | 9EUKA  | <i>Spiroplasma salmonicida</i>                                                                                                                               |
| LUCCU | <i>Lucilia cuprina</i>                          | 9FUNG  | <i>Rozella allomyces</i> CSF55                                                                                                                               |
| MACFA | <i>Macaca fascicularis</i>                      | 9MICR  | <i>Anncaliia algerae</i> PRA109                                                                                                                              |
| MACMU | <i>Macaca mulatta</i>                           | 9SPIT  | <i>Oxytricha trifallax</i>                                                                                                                                   |
| MONBE | <i>Monosiga brevicollis</i>                     | 9STRA  | <i>Saprolegnia diclina</i> VS20/ <i>Albugo candida</i> / <i>Aphanomyces invadans</i> / <i>Aphanomyces astaci</i>                                             |
| MONDO | <i>Monodelphis domestica</i>                    | 9TRYP  | <i>Phytomonas</i> sp. isolate Hart1/ <i>Phytomonas</i> sp. isolate EM1/ <i>Leptomonas</i> / <i>Strigomonas culicis pyrrhocoris</i> / <i>Angomonas deanei</i> |
| MOUSE | <i>Mus musculus</i>                             |        |                                                                                                                                                              |

Table S1. Eukaryotic species with orthologous sequences in the G3PO benchmark.

| BBS family | Human reference protein |                |             |                |                |                               | No. of orthologous sequences |
|------------|-------------------------|----------------|-------------|----------------|----------------|-------------------------------|------------------------------|
|            | Uniprot name            | Uniprot Access | Length (AA) | No. of domains | No. of repeats | No. of low complexity regions |                              |
| BBS 1      | BBS1_HUMAN              | Q8NFJ9         | 593         | 1              | 0              | 7                             | 127                          |
| BBS 2      | BBS2_HUMAN              | Q9BXC9         | 721         | 3              | 0              | 3                             | 119                          |
| BBS 3      | ARL6_HUMAN              | Q9H0F7         | 186         | 1              | 0              | 1                             | 119                          |
| BBS 4      | BBS4_HUMAN              | Q96RK4         | 519         | 10             | 10             | 5                             | 130                          |
| BBS 5      | BBS5_HUMAN              | Q8N3I7         | 341         | 1              | 0              | 0                             | 125                          |
| BBS 6      | MKKS_HUMAN              | Q9NPJ1         | 570         | 1              | 0              | 0                             | 54                           |
| BBS 7      | BBS7_HUMAN              | Q8IWZ6         | 715         | 2              | 0              | 2                             | 117                          |
| BBS 8      | TTC8_HUMAN              | Q8TAM2         | 541         | 8              | 8              | 5                             | 138                          |
| BBS 9      | PTHB1_HUMAN             | Q3SYG4         | 887         | 2              | 0              | 5                             | 131                          |
| BBS 10     | BBS10_HUMAN             | Q8TAM1         | 723         | 1              | 0              | 4                             | 37                           |
| BBS 11     | TRI32_HUMAN             | Q13049         | 648         | 6              | 5              | 3                             | 40                           |
| BBS 12     | BBS12_HUMAN             | Q6ZW61         | 710         | 1              | 0              | 3                             | 44                           |
| BBS 13     | MKS1_HUMAN              | Q9NXB0         | 559         | 1              | 0              | 6                             | 90                           |
| BBS 15     | FRITZ_HUMAN             | O95876         | 746         | 3              | 2              | 6                             | 71                           |
| BBS 16     | SDCG8_HUMAN             | Q86SQ7         | 713         | 1              | 0              | 8                             | 54                           |
| BBS 17     | LZTL1_HUMAN             | Q9NQ48         | 299         | 1              | 0              | 4                             | 79                           |
| BBS 18     | BBIP1_HUMAN             | A8MTZ0         | 92          | 1              | 0              | 2                             | 36                           |
| BBS 19     | IFT27_HUMAN             | Q9BW83         | 181         | 1              | 0              | 0                             | 85                           |
| BBS 20     | IFT74_HUMAN             | Q96LB3         | 600         | 0              | 0              | 4                             | 131                          |
| BBS 21     | CH037_HUMAN             | Q96NL8         | 207         | 1              | 0              | 4                             | 66                           |

Table S2. Bardet-Biedl Syndrome (BBS) protein families used in the benchmark. ‘Low complexity regions’ include predicted low complexity, disordered and coiled coil regions.

| Clade        |               |                  | No. of species  | No. of sequences | No. of Confirmed sequences |     |
|--------------|---------------|------------------|-----------------|------------------|----------------------------|-----|
| Opisthokonta | Metazoa       | Chordata         | Craniata        | 46               | 766                        | 503 |
|              |               |                  | Tunicata        | 2                | 25                         | 9   |
|              |               |                  | Mollusca        | 2                | 33                         | 12  |
|              |               |                  | Platyhelminthes | 1                | 10                         | 1   |
|              |               |                  | Panarthropoda   | 29               | 264                        | 96  |
|              |               |                  | Nematoda        | 8                | 71                         | 28  |
|              |               |                  | Cnidaria        | 1                | 18                         | 8   |
|              |               |                  | Others Metazoa  | 3                | 49                         | 18  |
|              |               | Fungi            | 8               | 25               | 11                         |     |
|              |               | Choanoflagellida | 2               | 22               | 5                          |     |
|              |               | Stramenopila     | 12              | 172              | 88                         |     |
|              | Euglenozoa    | 9                | 149             | 60               |                            |     |
|              | Viridiplantae | 4                | 12              | 4                |                            |     |
|              | Alveolata     | 11               | 99              | 24               |                            |     |
|              | Rhizaria      | 2                | 21              | 5                |                            |     |
|              | Others        | 7                | 57              | 17               |                            |     |

Table S3. Phylogenetic distribution of benchmark sequences. ‘Others Metazoa’ contains 3 species that were not classified in one of the main groups, and ‘Others’ contains 7 unicellular eukaryote species.

| <b>Uniprot Species identifier</b> | <b>No. of sequences</b> | <b>No. of Unconfirmed sequences</b> | <b>% Unconfirmed sequences</b> | <b>Uniprot Species identifier</b> | <b>No. of sequences</b> | <b>No. of Unconfirmed sequences</b> | <b>% Unconfirmed sequences</b> |
|-----------------------------------|-------------------------|-------------------------------------|--------------------------------|-----------------------------------|-------------------------|-------------------------------------|--------------------------------|
| HUMAN                             | 20                      | 0                                   | 0                              | FICAL                             | 17                      | 10                                  | 59                             |
| HORSE                             | 20                      | 3                                   | 15                             | DROSE                             | 10                      | 6                                   | 60                             |
| RAT                               | 20                      | 3                                   | 15                             | LEIBR                             | 10                      | 6                                   | 60                             |
| CALJA                             | 19                      | 3                                   | 16                             | THECL                             | 10                      | 6                                   | 60                             |
| MOUSE                             | 19                      | 3                                   | 16                             | TRYB2                             | 10                      | 6                                   | 60                             |
| RABIT                             | 18                      | 3                                   | 17                             | TRYRA                             | 10                      | 6                                   | 60                             |
| BRUPA                             | 10                      | 2                                   | 20                             | CHLRE                             | 13                      | 8                                   | 62                             |
| CHLSB                             | 20                      | 4                                   | 20                             | PLABS                             | 13                      | 8                                   | 62                             |
| PONAB                             | 20                      | 4                                   | 20                             | PYTUL                             | 13                      | 8                                   | 62                             |
| LOXAF                             | 19                      | 4                                   | 21                             | 9HYME                             | 45                      | 28                                  | 62                             |
| NOMLE                             | 19                      | 4                                   | 21                             | PELSI                             | 19                      | 12                                  | 63                             |
| XIPMA                             | 19                      | 4                                   | 21                             | ACREC                             | 11                      | 7                                   | 64                             |
| MACFA                             | 18                      | 4                                   | 22                             | CAERE                             | 11                      | 7                                   | 64                             |
| BOVIN                             | 21                      | 5                                   | 24                             | CULQU                             | 11                      | 7                                   | 64                             |
| GORGO                             | 19                      | 5                                   | 26                             | ENTVE                             | 11                      | 7                                   | 64                             |
| MACMU                             | 19                      | 5                                   | 26                             | PHYNI                             | 11                      | 7                                   | 64                             |
| TETNG                             | 15                      | 4                                   | 27                             | SALR5                             | 11                      | 7                                   | 64                             |
| ACYPI                             | 10                      | 3                                   | 30                             | VITBC                             | 14                      | 9                                   | 64                             |
| PHYIT                             | 13                      | 4                                   | 31                             | 9BILA                             | 38                      | 25                                  | 66                             |
| PHYSP                             | 13                      | 4                                   | 31                             | LEIIN                             | 12                      | 8                                   | 67                             |
| AILME                             | 19                      | 6                                   | 32                             | MICPC                             | 12                      | 8                                   | 67                             |
| OTOGA                             | 19                      | 6                                   | 32                             | STYLE                             | 12                      | 8                                   | 67                             |
| PIG                               | 19                      | 6                                   | 32                             | 9TRYP                             | 54                      | 36                                  | 67                             |
| POEFO                             | 19                      | 6                                   | 32                             | ASTMX                             | 19                      | 13                                  | 68                             |
| MUSPF                             | 18                      | 6                                   | 33                             | ALLMI                             | 16                      | 11                                  | 69                             |
| PHYPR                             | 24                      | 8                                   | 33                             | AEDAE                             | 10                      | 7                                   | 70                             |
| CAVPO                             | 20                      | 7                                   | 35                             | PHYRM                             | 10                      | 7                                   | 70                             |
| ICTTR                             | 17                      | 6                                   | 35                             | CRAGI                             | 17                      | 12                                  | 71                             |
| CANLF                             | 19                      | 7                                   | 37                             | STRMM                             | 14                      | 10                                  | 71                             |
| TAKRU                             | 16                      | 6                                   | 38                             | CAEBE                             | 11                      | 8                                   | 73                             |
| TRIAD                             | 16                      | 6                                   | 38                             | LEIMA                             | 11                      | 8                                   | 73                             |
| TRYCR                             | 16                      | 6                                   | 38                             | NASVI                             | 11                      | 8                                   | 73                             |
| FELCA                             | 18                      | 7                                   | 39                             | PEDHC                             | 11                      | 8                                   | 73                             |
| FUKDA                             | 18                      | 7                                   | 39                             | MYOBR                             | 19                      | 14                                  | 74                             |
| PANTR                             | 18                      | 7                                   | 39                             | CHEMY                             | 12                      | 9                                   | 75                             |
| SARHA                             | 18                      | 7                                   | 39                             | CIOSA                             | 12                      | 9                                   | 75                             |
| 9STRA                             | 46                      | 18                                  | 39                             | MICCC                             | 12                      | 9                                   | 75                             |
| STREA                             | 10                      | 4                                   | 40                             | NAEGR                             | 12                      | 9                                   | 75                             |
| BRUMA                             | 12                      | 5                                   | 42                             | TOXCA                             | 12                      | 9                                   | 75                             |
| PHYPN                             | 12                      | 5                                   | 42                             | STRPU                             | 20                      | 15                                  | 75                             |
| PAPAN                             | 19                      | 8                                   | 42                             | 9SPIT                             | 13                      | 10                                  | 77                             |
| DANRE                             | 21                      | 9                                   | 43                             | HAECO                             | 13                      | 10                                  | 77                             |

|       |    |    |    |       |    |    |     |
|-------|----|----|----|-------|----|----|-----|
| GASAC | 16 | 7  | 44 | HELRO | 13 | 10 | 77  |
| ORYLA | 16 | 7  | 44 | NIPBR | 13 | 10 | 77  |
| ANOCA | 18 | 8  | 44 | AMPQE | 18 | 14 | 78  |
| SHEEP | 18 | 8  | 44 | AMAAE | 14 | 11 | 79  |
| ORENI | 20 | 9  | 45 | PARTE | 14 | 11 | 79  |
| LOALO | 11 | 5  | 45 | TUPCH | 14 | 11 | 79  |
| TRICA | 11 | 5  | 45 | ANOQA | 10 | 8  | 80  |
| TRIVA | 13 | 6  | 46 | ASCSU | 10 | 8  | 80  |
| HETGA | 17 | 8  | 47 | CAEBR | 10 | 8  | 80  |
| MONDO | 19 | 9  | 47 | PAPMA | 10 | 8  | 80  |
| ORNAN | 19 | 9  | 47 | PSEPJ | 10 | 8  | 80  |
| PARTI | 10 | 5  | 50 | TETUR | 10 | 8  | 80  |
| CHICK | 16 | 8  | 50 | OIKDI | 11 | 9  | 82  |
| TRYCC | 18 | 9  | 50 | RHOPR | 11 | 9  | 82  |
| XENTR | 20 | 10 | 50 | ECTSI | 13 | 11 | 85  |
| MYODS | 15 | 8  | 53 | 9TREM | 18 | 16 | 89  |
| 9EUKA | 13 | 7  | 54 | 9TELE | 19 | 17 | 89  |
| CIOIN | 13 | 7  | 54 | 9CHLO | 10 | 9  | 90  |
| ZOONE | 13 | 7  | 54 | CLOSI | 10 | 9  | 90  |
| ATTCE | 11 | 6  | 55 | DRAME | 10 | 9  | 90  |
| CAMFO | 11 | 6  | 55 | NECAM | 10 | 9  | 90  |
| LEPSE | 11 | 6  | 55 | SCHHA | 10 | 9  | 90  |
| ONCVO | 11 | 6  | 55 | SCHMA | 10 | 9  | 90  |
| VOLCA | 11 | 6  | 55 | CAMFR | 11 | 10 | 91  |
| BRAFL | 20 | 11 | 55 | DANPL | 11 | 10 | 91  |
| LEPOC | 20 | 11 | 55 | DAPPU | 11 | 10 | 91  |
| MYOLU | 18 | 10 | 56 | IXOSC | 11 | 10 | 91  |
| NEMVE | 18 | 10 | 56 | MONBE | 11 | 10 | 91  |
| LOTGI | 16 | 9  | 56 | PAPXU | 12 | 11 | 92  |
| SAPPC | 16 | 9  | 56 | DENPD | 10 | 10 | 100 |
| LATCH | 19 | 11 | 58 | PERM5 | 10 | 10 | 100 |
| PTEAL | 19 | 11 | 58 | SARSC | 10 | 10 | 100 |
| GUITH | 12 | 7  | 58 | AURAN | 11 | 11 | 100 |
| STRER | 12 | 7  | 58 | OPPHA | 16 | 16 | 100 |
| TETTS | 12 | 7  | 58 |       |    |    |     |

Table S4. Species with at least 10 sequences in the benchmark, ranked by the percentage of Unconfirmed sequences identified.

|  |           | No. of sequences | DNA sequence     |          | Exon map          |                  |                    | Protein sequence    |
|--|-----------|------------------|------------------|----------|-------------------|------------------|--------------------|---------------------|
|  |           |                  | Mean gene length | Mean %GC | Mean no. of exons | Mean exon length | Mean intron length | Mean protein length |
|  | All       | 283              | 95584            | 37.4     | 14                | 186              | 6269               | 551                 |
|  | Confirmed | 133              | 95533            | 39.81    | 14                | 179              | 6047               | 515                 |

|                     |             |      |       |       |     |     |      |     |
|---------------------|-------------|------|-------|-------|-----|-----|------|-----|
| With UDT regions    | Unconfirmed | 150  | 95629 | 39.76 | 14  | 192 | 6466 | 582 |
| Without UDT regions | All         | 1510 | 15934 | 44.2  | 7.6 | 563 | 1161 | 514 |
|                     | Confirmed   | 756  | 18367 | 43.9  | 8.0 | 556 | 1438 | 482 |
|                     | Unconfirmed | 754  | 13496 | 44.6  | 7.2 | 570 | 883  | 546 |

Table S5. Comparison of the 283 gene sequences with undetermined (UDT) regions and 1510 sequences without UDT regions for both Confirmed and Unconfirmed sequences.

|            | Nucleotide level |      |      | Exon level |      |      |      |                 |                | Protein level |                |
|------------|------------------|------|------|------------|------|------|------|-----------------|----------------|---------------|----------------|
|            | Sn               | Sp   | F1   | Sn         | Sp   | ME   | WE   | 5' (first exon) | 3' (last exon) | % Identity    | Perfect (100%) |
| Augustus   | 0.51             | 0.58 | 0.52 | 0.27       | 0.30 | 0.65 | 0.62 | 31.0 (27.6)     | 31.2 (32.5)    | 75.39         | 209            |
| Genscan    | 0.50             | 0.57 | 0.51 | 0.23       | 0.28 | 0.74 | 0.69 | 31.5 (25.6)     | 33.3 (24.0)    | 71.74         | 135            |
| GeneID     | 0.38             | 0.52 | 0.40 | 0.14       | 0.19 | 0.85 | 0.79 | 24.6 (19.7)     | 27.0 (18.0)    | 52.57         | 91             |
| GlimmerHMM | 0.74             | 0.43 | 0.45 | 0.18       | 0.22 | 0.81 | 0.75 | 24.8 (22.7)     | 31.4 (23.2)    | 60.06         | 136            |
| Snap       | 0.38             | 0.45 | 0.39 | 0.15       | 0.18 | 0.67 | 0.64 | 20.5 (19.1)     | 21.8 (20.5)    | 46.60         | 112            |

Table S6. Overall performance the 5 gene prediction programs, using the 889 Confirmed sequences. Sn=sensitivity; Sp=specificity; F1=F1 score; ME=Missing Exons; WE=Wrong Exons; 5'=Percentage of correctly predicted 5' exon boundaries (first exon=Percentage of correctly predicted 5' boundaries of first exons only); 3'=Percentage of correctly predicted 3' exon boundaries (last exon=Percentage of correctly predicted 3' boundaries of the last exons only). % Identity indicates the average sequence identity observed between the predicted proteins and the benchmark sequences. 'Perfect' indicates proteins predicted with 100% identity compared to the benchmark sequence.

| Program    | CPU time for gene sequence +150bp upstream and downstream (seconds) | CPU time for gene sequence +10Kb upstream and downstream (seconds) |
|------------|---------------------------------------------------------------------|--------------------------------------------------------------------|
| Augustus   | 1826                                                                | 4172                                                               |
| Genscan    | 484                                                                 | 897                                                                |
| GeneID     | 196                                                                 | 260                                                                |
| GlimmerHMM | 540                                                                 | 698                                                                |
| Snap       | 266                                                                 | 443                                                                |

Table S7. Total time required to process the 1793 genomic sequences covering the gene region with 150bp (total length = 51,699,512 nucleotides) and with 10Kb upstream/downstream flanking sequences (total length = 86,970,612 nucleotides).

#### Augustus

|      | Nucleotide level |      |      | Exon level |      |      |      | Protein level |                |
|------|------------------|------|------|------------|------|------|------|---------------|----------------|
|      | Sn               | Sp   | F1   | Sn         | Sp   | ME   | WE   | % Identity    | Perfect (100%) |
| 10Kb | 0.50             | 0.61 | 0.53 | 0.25       | 0.28 | 0.67 | 0.62 | 67.71         | 172            |
| 8Kb  | 0.51             | 0.60 | 0.53 | 0.26       | 0.28 | 0.67 | 0.62 | 68.25         | 172            |
| 6Kb  | 0.51             | 0.60 | 0.53 | 0.26       | 0.28 | 0.67 | 0.62 | 68.68         | 176            |
| 4Kb  | 0.51             | 0.60 | 0.53 | 0.26       | 0.28 | 0.67 | 0.63 | 69.50         | 177            |
| 2Kb  | 0.51             | 0.59 | 0.53 | 0.26       | 0.28 | 0.67 | 0.62 | 72.43         | 186            |
| 150b | 0.51             | 0.58 | 0.52 | 0.27       | 0.30 | 0.65 | 0.62 | 75.39         | 209            |

Genscan

|      | Nucleotide level |      |      | Exon level |      |      |      | Protein level |                |
|------|------------------|------|------|------------|------|------|------|---------------|----------------|
|      | Sn               | Sp   | F1   | Sn         | Sp   | ME   | WE   | % Identity    | Perfect (100%) |
| 10Kb | 0.50             | 0.61 | 0.53 | 0.20       | 0.24 | 0.77 | 0.72 | 58.79         | 106            |
| 8Kb  | 0.50             | 0.61 | 0.52 | 0.20       | 0.24 | 0.77 | 0.72 | 59.35         | 106            |
| 6Kb  | 0.50             | 0.60 | 0.52 | 0.20       | 0.24 | 0.77 | 0.72 | 59.97         | 105            |
| 4Kb  | 0.50             | 0.60 | 0.52 | 0.20       | 0.24 | 0.77 | 0.72 | 61.11         | 104            |
| 2Kb  | 0.50             | 0.59 | 0.52 | 0.20       | 0.24 | 0.77 | 0.72 | 64.20         | 103            |
| 150b | 0.50             | 0.57 | 0.51 | 0.23       | 0.28 | 0.74 | 0.69 | 71.74         | 135            |

GeneID

|      | Nucleotide level |      |      | Exon level |      |      |      | Protein level |                |
|------|------------------|------|------|------------|------|------|------|---------------|----------------|
|      | Sn               | Sp   | F1   | Sn         | Sp   | ME   | WE   | % Identity    | Perfect (100%) |
| 10Kb | 0.38             | 0.56 | 0.42 | 0.13       | 0.17 | 0.87 | 0.76 | 48.61         | 74             |
| 8Kb  | 0.38             | 0.56 | 0.42 | 0.13       | 0.17 | 0.87 | 0.76 | 48.74         | 75             |
| 6Kb  | 0.38             | 0.56 | 0.42 | 0.13       | 0.17 | 0.87 | 0.76 | 49.06         | 75             |
| 4Kb  | 0.38             | 0.56 | 0.42 | 0.13       | 0.17 | 0.87 | 0.76 | 49.61         | 75             |
| 2Kb  | 0.38             | 0.55 | 0.41 | 0.13       | 0.17 | 0.87 | 0.77 | 50.31         | 76             |
| 150b | 0.38             | 0.52 | 0.40 | 0.14       | 0.19 | 0.85 | 0.79 | 52.57         | 91             |

GlimmerHMM

|      | Nucleotide level |      |      | Exon level |      |      |      | Protein level |                |
|------|------------------|------|------|------------|------|------|------|---------------|----------------|
|      | Sn               | Sp   | F1   | Sn         | Sp   | ME   | WE   | % Identity    | Perfect (100%) |
| 10Kb | 0.83             | 0.45 | 0.49 | 0.19       | 0.23 | 0.81 | 0.74 | 59.25         | 139            |
| 8Kb  | 0.83             | 0.45 | 0.49 | 0.19       | 0.23 | 0.81 | 0.74 | 59.59         | 139            |
| 6Kb  | 0.82             | 0.45 | 0.49 | 0.19       | 0.23 | 0.80 | 0.74 | 59.81         | 141            |
| 4Kb  | 0.81             | 0.45 | 0.49 | 0.19       | 0.23 | 0.80 | 0.74 | 60.32         | 141            |
| 2Kb  | 0.78             | 0.44 | 0.48 | 0.18       | 0.22 | 0.80 | 0.75 | 60.21         | 138            |
| 150b | 0.74             | 0.43 | 0.45 | 0.18       | 0.22 | 0.81 | 0.75 | 60.06         | 136            |

Snap

|      | Nucleotide level |      |      | Exon level |      |      |      | Protein level |                |
|------|------------------|------|------|------------|------|------|------|---------------|----------------|
|      | Sn               | Sp   | F1   | Sn         | Sp   | ME   | WE   | % Identity    | Perfect (100%) |
| 10Kb | 0.38             | 0.53 | 0.40 | 0.14       | 0.17 | 0.72 | 0.67 | 45.52         | 109            |
| 8Kb  | 0.38             | 0.53 | 0.40 | 0.15       | 0.18 | 0.71 | 0.67 | 45.68         | 111            |
| 6Kb  | 0.38             | 0.52 | 0.40 | 0.15       | 0.18 | 0.71 | 0.67 | 45.58         | 112            |
| 4Kb  | 0.38             | 0.52 | 0.40 | 0.15       | 0.18 | 0.70 | 0.66 | 46.14         | 113            |
| 2Kb  | 0.38             | 0.49 | 0.40 | 0.15       | 0.18 | 0.69 | 0.66 | 46.21         | 113            |
| 150b | 0.38             | 0.45 | 0.39 | 0.15       | 0.18 | 0.67 | 0.64 | 46.60         | 112            |

Table S8. Effect of the genomic context based on the different lengths of upstream/downstream flanking genomic sequences on the performance of the 5 gene prediction programs at the nucleotide, exon and protein levels, using 889 Confirmed sequences. Sn=sensitivity; Sp=specificity; F1=F1 score; ME=Missing Exons; WE=Wrong Exons. %Identity indicates the average sequence identity observed between the predicted proteins and the benchmark sequences. 'Perfect' indicates proteins predicted with 100% identity compared to the benchmark sequence.

542 Metazoan sequences without UDT regions

|             | Nucleotide level |      |      | Exon level |      |      |      |             |             | Protein level |                |
|-------------|------------------|------|------|------------|------|------|------|-------------|-------------|---------------|----------------|
|             | Sn               | Sp   | F1   | Sn         | Sp   | ME   | WE   | 5' (start)  | 3' (stop)   | % Identity    | Perfect (100%) |
| Augustus    | 0.44             | 0.55 | 0.47 | 0.23       | 0.26 | 0.69 | 0.64 | 32.1 (21.6) | 33.2 (26.2) | 74.44         | 94             |
| Genscan     | 0.45             | 0.57 | 0.48 | 0.19       | 0.24 | 0.79 | 0.73 | 33.1 (14.9) | 33.4 (24.7) | 67.13         | 46             |
| GeneID      | 0.34             | 0.52 | 0.38 | 0.14       | 0.18 | 0.86 | 0.77 | 25.7 (14.8) | 26.5 (15.3) | 52.26         | 41             |
| Glimmer HMM | 0.77             | 0.38 | 0.42 | 0.14       | 0.18 | 0.85 | 0.79 | 25.8 (17.7) | 26.3 (19.0) | 59.36         | 57             |
| Snap        | 0.33             | 0.46 | 0.35 | 0.14       | 0.17 | 0.73 | 0.68 | 23.5 (17.5) | 25.4 (15.5) | 44.20         | 51             |

133 Metazoan sequences with UDT regions

|             | Nucleotide level |      |      | Exon level |      |      |      |             |             | Protein level |                |
|-------------|------------------|------|------|------------|------|------|------|-------------|-------------|---------------|----------------|
|             | Sn               | Sp   | F1   | Sn         | Sp   | ME   | WE   | 5' (start)  | 3' (stop)   | % Identity    | Perfect (100%) |
| Augustus    | 0.27             | 0.35 | 0.27 | 0.22       | 0.26 | 0.71 | 0.64 | 33.9 (20.3) | 34.0 (18.0) | 66.87         | 4              |
| Genscan     | 0.29             | 0.27 | 0.25 | 0.17       | 0.22 | 0.82 | 0.76 | 28.3 (12.0) | 29.7 (7.5)  | 52.88         | 3              |
| GeneID      | 0.19             | 0.22 | 0.17 | 0.11       | 0.16 | 0.89 | 0.82 | 22.9 (9.0)  | 24.8 (3.8)  | 34.91         | 0              |
| Glimmer HMM | 0.71             | 0.08 | 0.12 | 0.12       | 0.17 | 0.88 | 0.82 | 20.8 (6.0)  | 22.3 (5.3)  | 42.97         | 5              |
| Snap        | 0.15             | 0.19 | 0.14 | 0.07       | 0.09 | 0.72 | 0.70 | 12.7 (12.8) | 14.9 (0.0)  | 25.19         | 0              |

Table S9. Performance of the 5 gene prediction programs, using all 542 metazoan sequences without undetermined (UDT) regions in reference genes and all 133 metazoans with UDT regions in reference gene. Sn=sensitivity; Sp=specificity; F1=F1 score; ME=Missing Exons; WE=Wrong Exons; 5'=Percentage of correctly predicted 5' exon boundaries (first exon=Percentage of correctly predicted 5' boundaries of first exons only); 3'=Percentage of correctly predicted 3' exon boundaries (last exon=Percentage of correctly predicted 3' boundaries of the last exons only). % Identity indicates the average sequence identity observed between the predicted proteins and the benchmark sequences. 'Perfect' indicates proteins predicted with 100% identity compared to the benchmark sequence.



A)

|                    | <b>No. of exons<br/>in G3PO</b> | <b>Augustus</b> | <b>Genscan</b> | <b>GeneID</b> | <b>GlimmerHMM</b> | <b>Snap</b>  |
|--------------------|---------------------------------|-----------------|----------------|---------------|-------------------|--------------|
| [0-50]             | 374                             | 18.4%           | 13.6%          | 12.3%         | 6.7%              | 9.4%         |
| ]50-100]           | 1919                            | 24.4%           | 20.0%          | 11.8%         | 12.6%             | 11.6%        |
| ]100-150]          | 1846                            | 25.6%           | 22.4%          | 12.7%         | 13.3%             | 12.7%        |
| ]150-200]          | 792                             | 25.1%           | 21.3%          | 15.4%         | 15.0%             | 13.9%        |
| >200               | 1180                            | 17.3%           | 15.2%          | 10.9%         | 14.0%             | 12.5%        |
| <b>Total exons</b> | <b>6111</b>                     | <b>23.1%</b>    | <b>19.6%</b>   | <b>12.4%</b>  | <b>13.0%</b>      | <b>12.3%</b> |

B)

|                |           | <b>Correct</b> | <b>Wrong</b> | <b>Wrong</b> |           |           |               |
|----------------|-----------|----------------|--------------|--------------|-----------|-----------|---------------|
|                |           |                |              | <b>Both</b>  | <b>5'</b> | <b>3'</b> | <b>Fusion</b> |
| Augustus       | [0-50]    | 69             | 187          | 147          | 24        | 16        | 0             |
|                | ]50-100]  | 468            | 795          | 700          | 45        | 50        | 0             |
|                | ]100-150] | 473            | 871          | 739          | 65        | 67        | 0             |
|                | ]150-200] | 199            | 371          | 306          | 38        | 26        | 1             |
|                | >200      | 204            | 343          | 145          | 104       | 80        | 14            |
| Genscan        | [0-50]    | 51             | 116          | 98           | 8         | 10        | 0             |
|                | ]50-100]  | 384            | 704          | 619          | 44        | 41        | 0             |
|                | ]100-150] | 413            | 916          | 776          | 74        | 66        | 0             |
|                | ]150-200] | 169            | 455          | 365          | 48        | 39        | 3             |
|                | >200      | 180            | 448          | 226          | 134       | 73        | 15            |
| GeneID         | [0-50]    | 46             | 359          | 296          | 34        | 29        | 0             |
|                | ]50-100]  | 226            | 595          | 518          | 38        | 39        | 0             |
|                | ]100-150] | 234            | 625          | 520          | 54        | 51        | 0             |
|                | ]150-200] | 122            | 304          | 242          | 26        | 36        | 0             |
|                | >200      | 129            | 387          | 207          | 102       | 74        | 4             |
| Glimmer<br>HMM | [0-50]    | 25             | 177          | 153          | 11        | 13        | 0             |
|                | ]50-100]  | 241            | 749          | 661          | 41        | 47        | 0             |
|                | ]100-150] | 245            | 709          | 606          | 57        | 46        | 0             |
|                | ]150-200] | 119            | 327          | 252          | 37        | 37        | 1             |
|                | >200      | 165            | 392          | 209          | 86        | 90        | 7             |
| SNAP           | [0-50]    | 35             | 292          | 261          | 13        | 18        | 0             |
|                | ]50-100]  | 222            | 594          | 501          | 46        | 47        | 0             |
|                | ]100-150] | 235            | 514          | 408          | 49        | 57        | 0             |
|                | ]150-200] | 110            | 259          | 187          | 38        | 33        | 1             |
|                | >200      | 148            | 304          | 154          | 78        | 65        | 7             |

Table S10. Effect of exon length on exon prediction quality. A) Proportion of all benchmark exons correctly predicted depending on the exon length. B) Number of internal exons predicted correctly, with either the 5' or 3' exon boundaries correct, or with both sites wrongly predicted, for each of the five programs.

|            | Protein length (amino acids) | % Identity | Perfect (100%) |
|------------|------------------------------|------------|----------------|
| Augustus   | <100                         | 57.45      | 4              |
|            | 100-300                      | 67.37      | 40             |
|            | 300-550                      | 75.27      | 58             |
|            | 550-650                      | 81.78      | 55             |
|            | >650                         | 70.04      | 25             |
| Genscan    | <100                         | 60.65      | 1              |
|            | 100-300                      | 52.56      | 13             |
|            | 300-550                      | 62.77      | 27             |
|            | 550-650                      | 78.78      | 42             |
|            | >650                         | 70.29      | 17             |
| GeneID     | <100                         | 51.31      | 2              |
|            | 100-300                      | 44.06      | 6              |
|            | 300-550                      | 54.47      | 21             |
|            | 550-650                      | 61.74      | 34             |
|            | >650                         | 51.10      | 13             |
| GlimmerHMM | <100                         | 68.30      | 5              |
|            | 100-300                      | 58.03      | 27             |
|            | 300-550                      | 63.21      | 38             |
|            | 550-650                      | 70.09      | 48             |
|            | >650                         | 60.32      | 15             |
| Snap       | <100                         | 34.29      | 3              |
|            | 100-300                      | 47.58      | 16             |
|            | 300-550                      | 57.66      | 42             |
|            | 550-650                      | 56.10      | 39             |
|            | >650                         | 38.85      | 13             |

Table S11. Effect of protein length on prediction accuracy at the protein level. %Identity indicates the average sequence identity observed between the predicted proteins and the benchmark sequences (Confirmed without UDT regions). ‘Perfect’ indicates proteins predicted with 100% identity compared to the benchmark sequence.

| Clade        |                  |               |          | Augustus   |                | Genscan    |                | GeneID     |                | GlimmerHMM |                | Snap       |                |
|--------------|------------------|---------------|----------|------------|----------------|------------|----------------|------------|----------------|------------|----------------|------------|----------------|
|              |                  |               |          | % Identity | Perfect (100%) | % Identity | Perfect (100%) | % Identity | Perfect (100%) | % Identity | Perfect (100%) | % Identity | Perfect (100%) |
| Opisthokonta | Metazoa          | Chordata      | Craniata | 72.23      | 44             | 69.71      | 31             | 49.22      | 19             | 55.86      | 23             | 33.03      | 16             |
|              |                  |               | Tunicata | 85.90      | 1              | 54.44      | 0              | 59.22      | 0              | 27.38      | 0              | 77.87      | 0              |
|              |                  | Mollusca      | 89.64    | 2          | 68.22          | 1          | 30.60          | 1          | 70.80          | 2          | 56.14          | 1          |                |
|              |                  | Panarthropoda | 82.60    | 30         | 69.11          | 13         | 66.57          | 14         | 69.18          | 15         | 73.82          | 21         |                |
|              |                  | Nematoda      | 78.38    | 15         | 47.16          | 1          | 76.35          | 7          | 89.19          | 15         | 81.80          | 12         |                |
|              |                  | Cnidaria      | 32.34    | 1          | 50.98          | 0          | 30.11          | 0          | 61.43          | 2          | 39.35          | 0          |                |
|              | Fungi            | 20.68         | 0        | 28.93      | 1              | 23.54      | 0              | 57.82      | 4              | 50.27      | 0              |            |                |
|              | Choanoflagellida | 20.57         | 0        | 66.07      | 0              | 38.06      | 0              | 26.44      | 0              | 15.62      | 0              |            |                |
|              | Stramenopila     | 67.73         | 21       | 70.33      | 22             | 59.66      | 16             | 76.55      | 19             | 76.08      | 28             |            |                |
|              | Euglenozoa       | 97.65         | 53       | 77.02      | 29             | 77.58      | 18             | 97.36      | 48             | 84.55      | 33             |            |                |

|               |       |   |       |   |       |   |       |   |       |   |
|---------------|-------|---|-------|---|-------|---|-------|---|-------|---|
| Viridiplantae | 94.77 | 2 | 43.57 | 0 | 73.50 | 0 | 62.34 | 0 | 48.46 | 0 |
| Alveolata     | 47.89 | 5 | 26.79 | 0 | 17.52 | 0 | 26.47 | 1 | 16.55 | 0 |
| Rhizaria      | 56.16 | 0 | 44.74 | 0 | 47.03 | 0 | 62.28 | 0 | 54.91 | 0 |
| Others        | 71.13 | 8 | 54.79 | 2 | 23.01 | 2 | 52.85 | 4 | 38.81 | 2 |

Table S12. Performance of the 5 gene prediction programs for sequences from different clades. The ‘Others’ group contains the Apusozoa, Cryptophyta, Diplomonadida, Haptophyceae, Heterolobosea, Parabasalia clades, as well as Placozoa, Annelida and urchin. %Identity indicates the average sequence identity observed between the predicted proteins and the benchmark sequences (Confirmed without UDT regions). ‘Perfect’ indicates proteins predicted with 100% identity compared to the benchmark sequence.

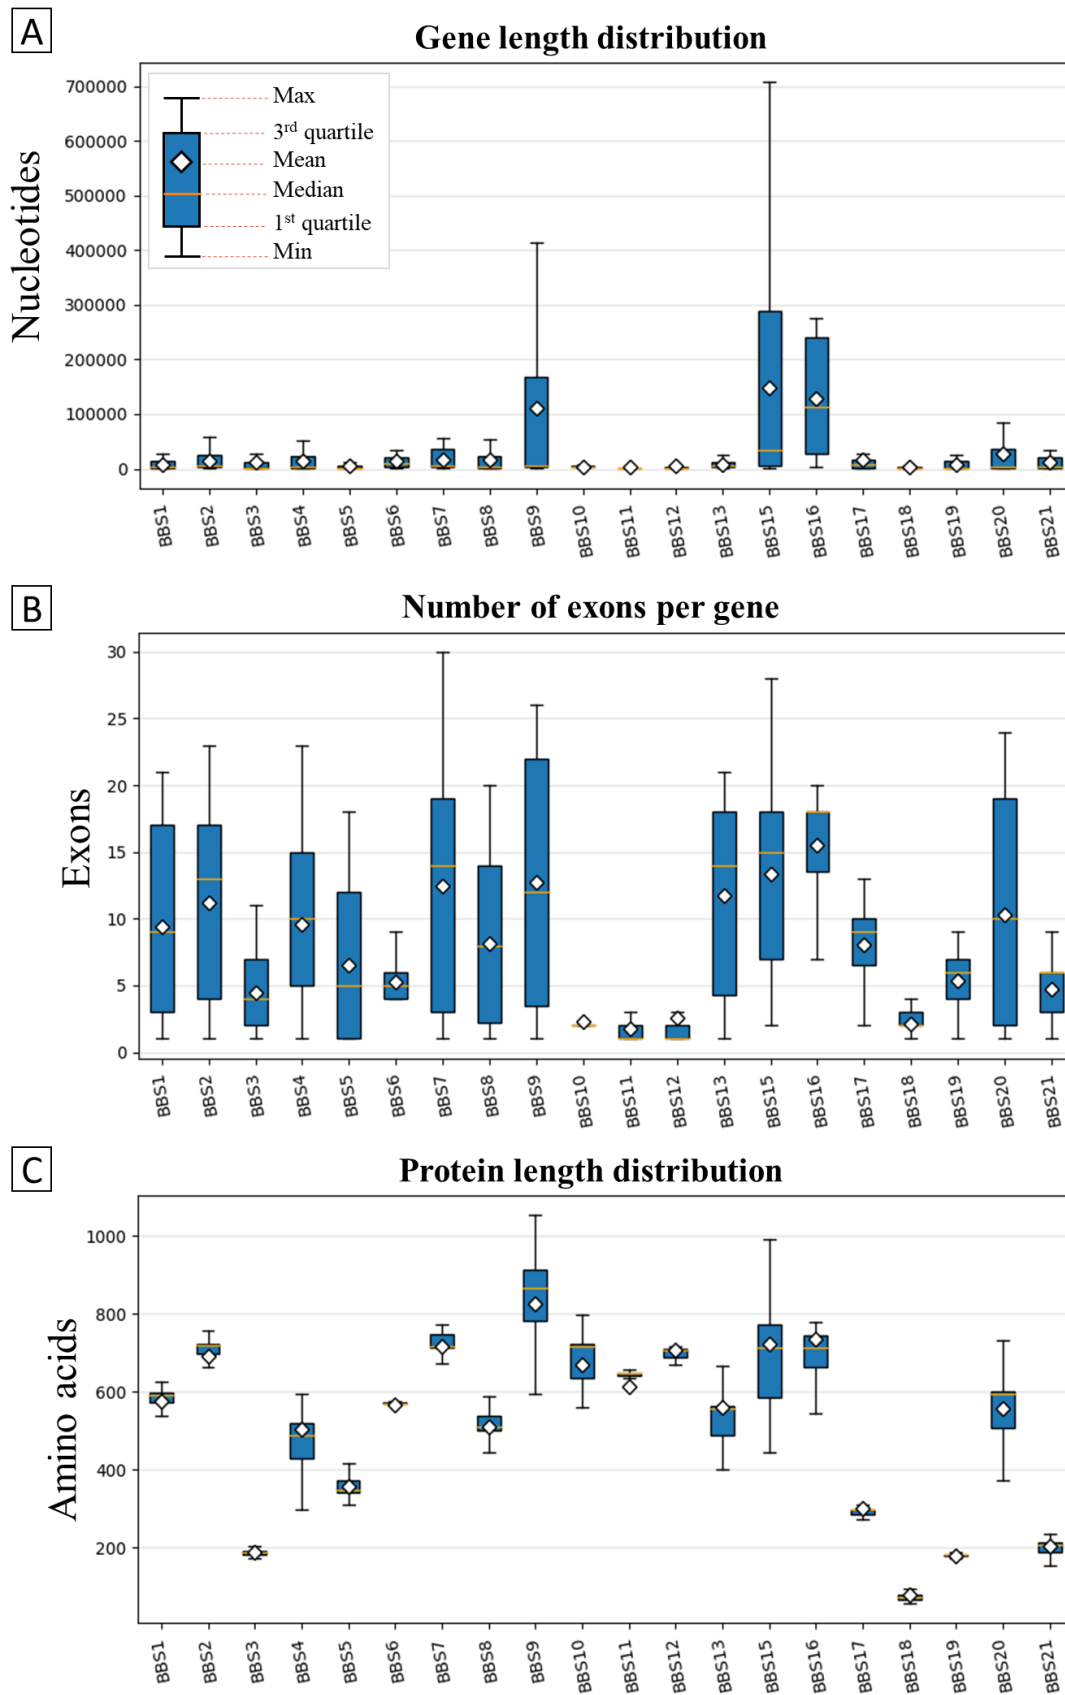

Figure S1. Distribution of A) gene length, B) number of exons and C) protein length for each orthologous protein family.

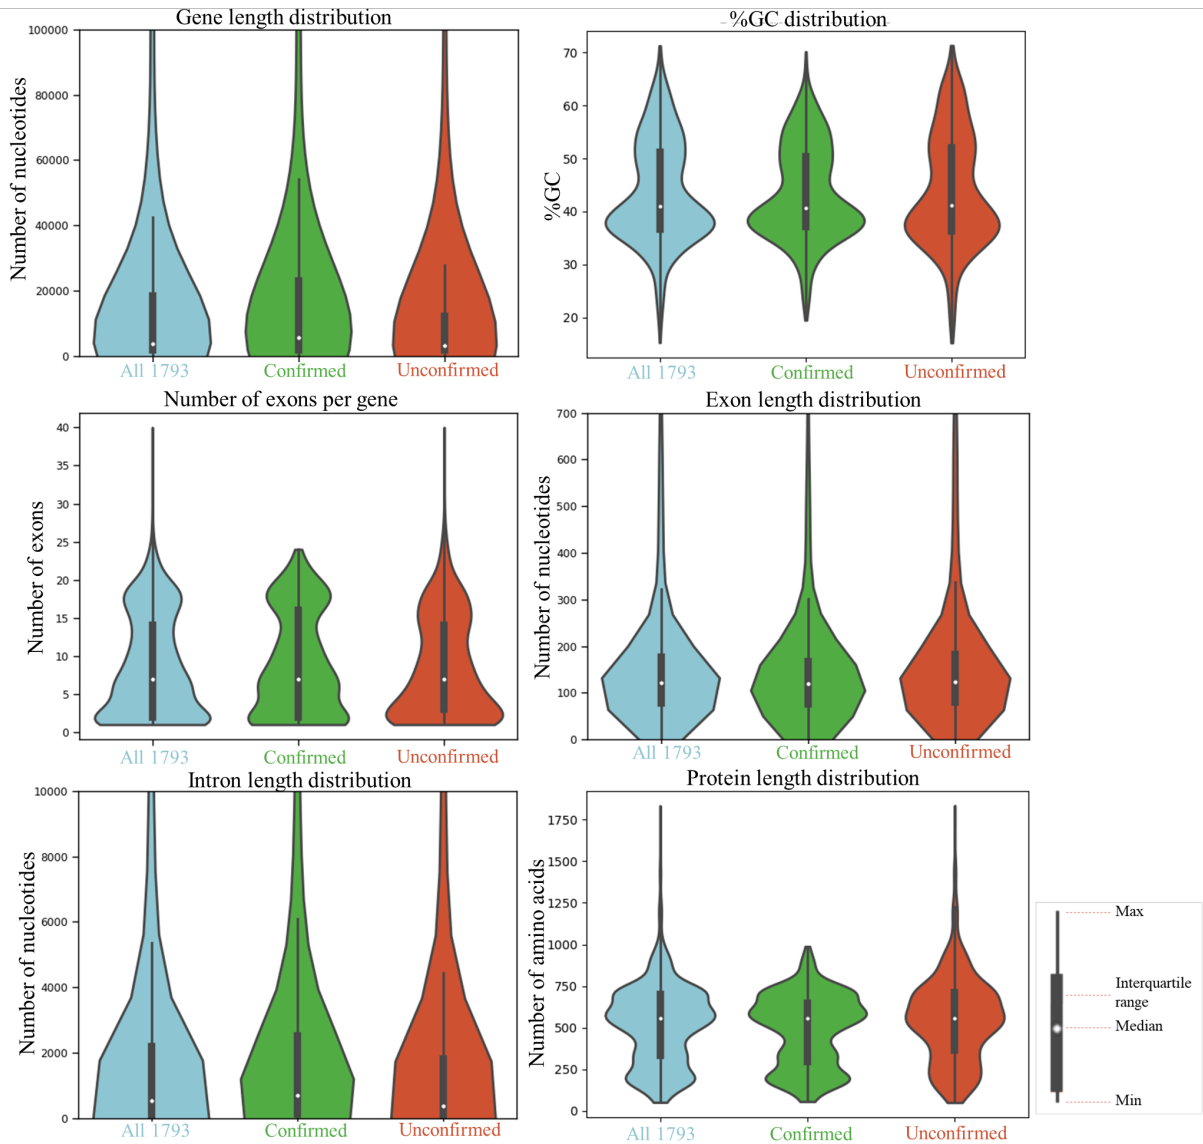

Figure S2. Main characteristics of the 1793 test cases in the benchmark for All sequences, Confirmed and Unconfirmed sequences only.

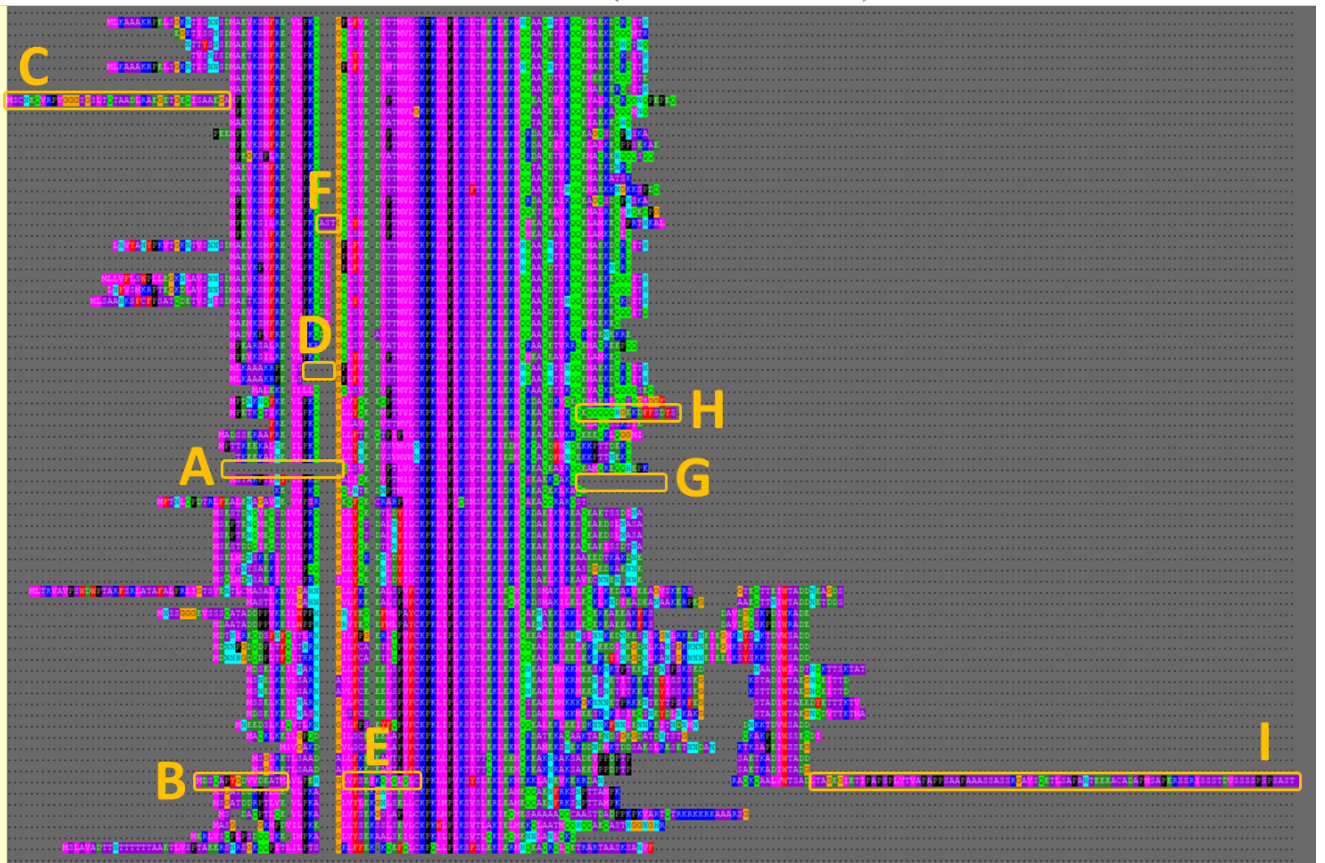

Figure S3. Schematic view of an MSA, showing the 9 categories of sequence errors, highlighted by orange boxes. **A**: N-terminal deletion **B**: N-terminal mismatched segment **C**: N-terminal insertion **D**: Internal deletion **E**: Internal mismatched segment **F**: Internal insertion **G**: C-terminal deletion **H**: C-terminal mismatched segment **I**: C-terminal insertion.

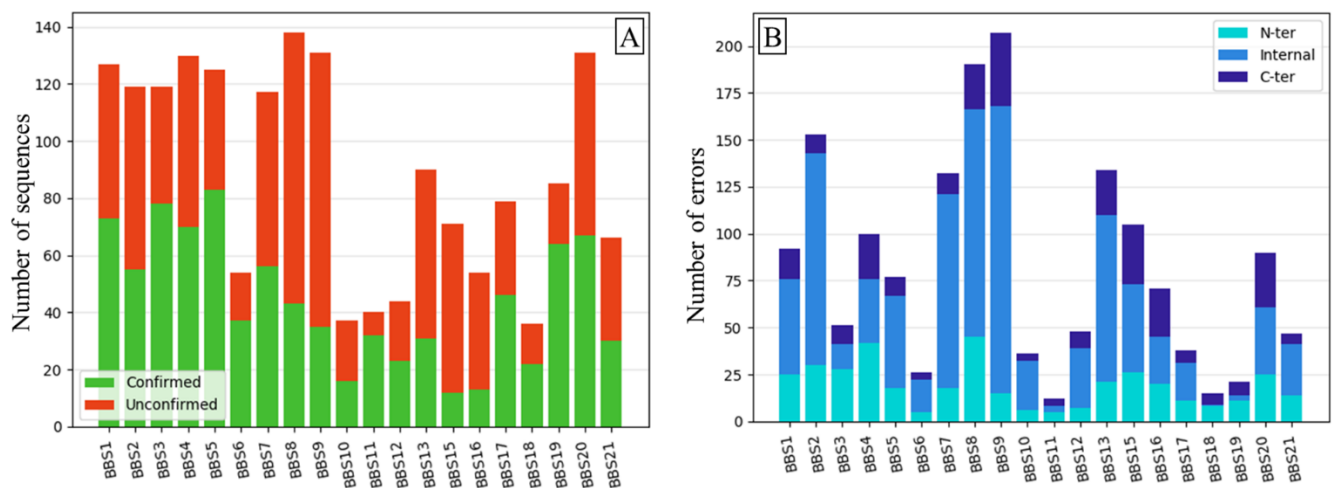

Figure S4. A) Number of Confirmed and Unconfirmed sequences in each orthologous protein family. B) Number and types of error in each orthologous protein family.

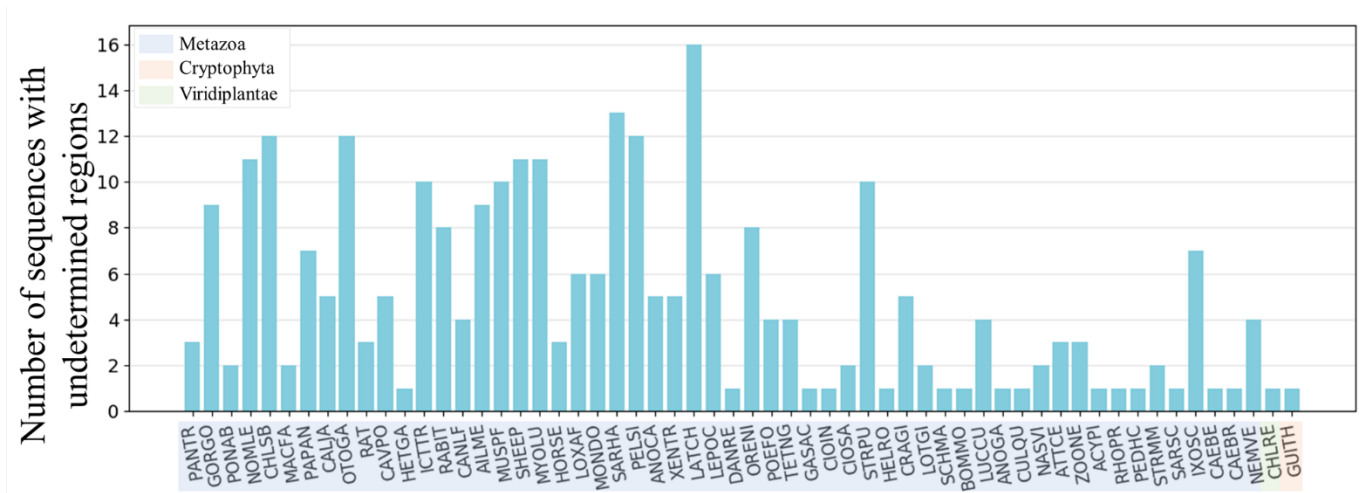

Figure S5. Number of sequences with undetermined (UDT) regions in each species.

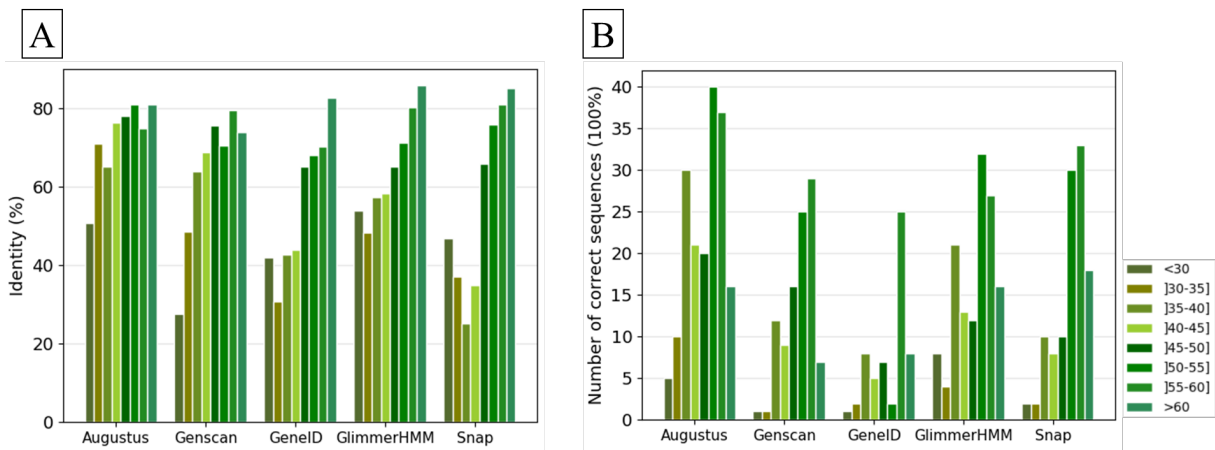

Figure S6. Effect of the %GC content of the gene on prediction accuracy: A) average percent identity between the predicted and the benchmark protein sequences, B) number of proteins perfectly predicted with 100% sequence identity.

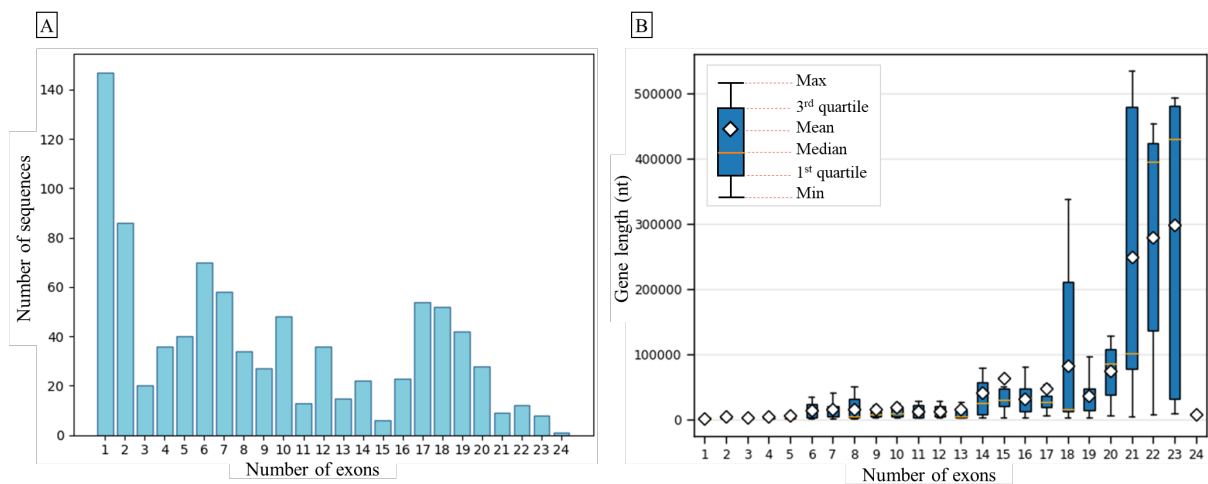

Figure S7. A) Number of Confirmed sequences with exon count ranging from 1 to 24. B) Distribution of gene lengths for sequences with exon count ranging from 1 to 24. 45% of

sequences have 1 to 6 exons. A second peak is observed at 17-19 exons, which correspond mostly to sequences from higher metazoans. The average gene sequence length increases with the complexity of the exon map (correlation=0.749, p-value=1.833e<sup>-160</sup>).

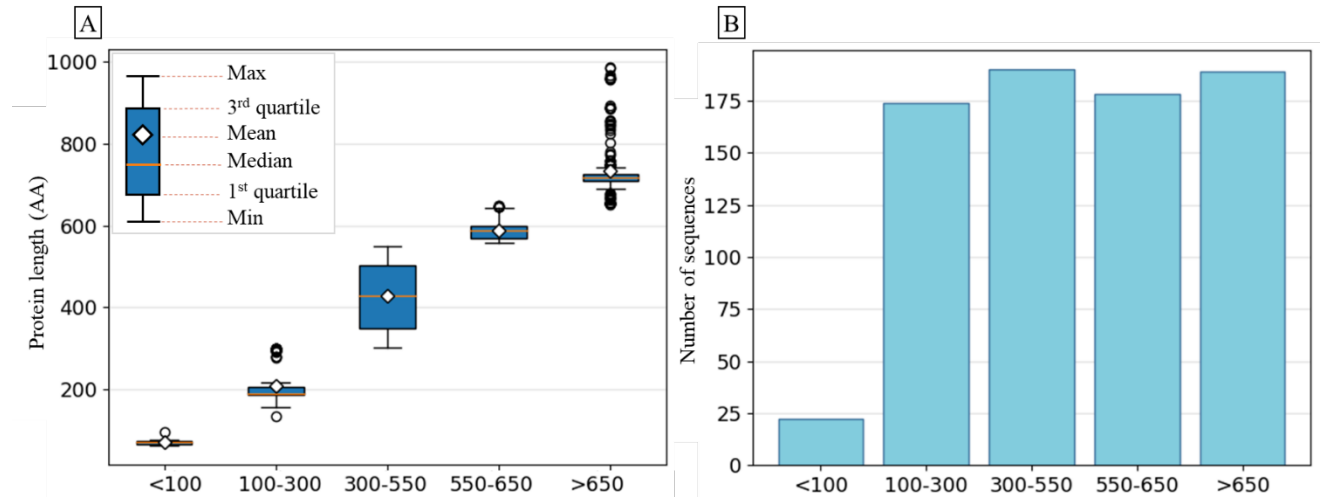

Figure S8. A) Distribution of protein lengths for Confirmed sequences. B) Number of Confirmed sequences with different protein lengths.

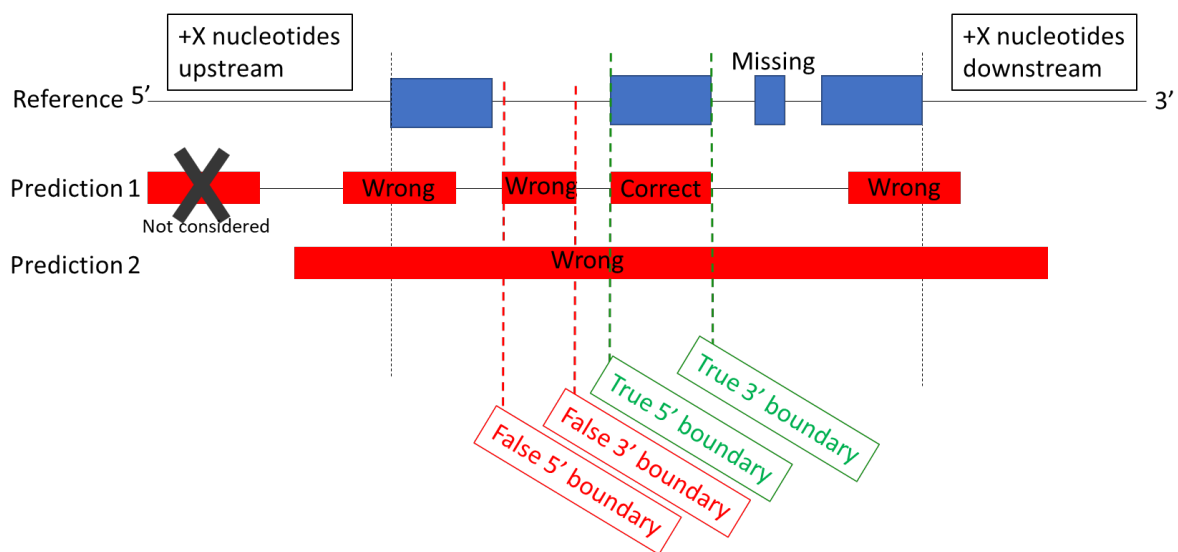

Figure S9. Evaluation metrics at the exon level.
